# Supplementary material
Source: PubMed Central journal article supplement (PMC5350566)
Supplement: EMBJ-36-816-s001.pdf [file EMBJ-36-816-s001.pdf]

# **Appendix**

## **Table of content**

### **Appendix Figures and Figure legends**

Appendix Figure S1: The syntaxin-1 R151A, I155A mutations do not influence the release kinetics.

Appendix Figure S2: Competitive effect of the cytoplasmic domain of syntaxin-1 (residues 2–253) in the binding between the fluorescent dye-labeled syntaxin-1 linker peptide (residues 148–162) and the MUN-BC fragment.

Appendix Figure S3: The syntaxin-1 R210E mutant does not influence the transit of syntaxin-1 from the Munc18-1/syntaxin-1 complex to the ternary SNARE complex mediated by the MUN domain.

### **Appendix Tables**

Appendix Table S1: Data summary table for the results shown in Figure 4 for the specified mutants of uncomplexed syntaxin-1-CC and syntaxin-1-CC (RIAA: R151A/I155A, LEAA: L165A/E166A, LEAA+RIAA: R151A/I155A/L165A/E166A).

Appendix Table S2: Data summary table for results shown in Figure 4 for syntaxin-1-CC.

Appendix Table S3: Data summary table for results shown in Figure 4 for syntaxin-1-MN.

**Appendix Supplementary Figures and Figure legends**

**Appendix Figure S1**

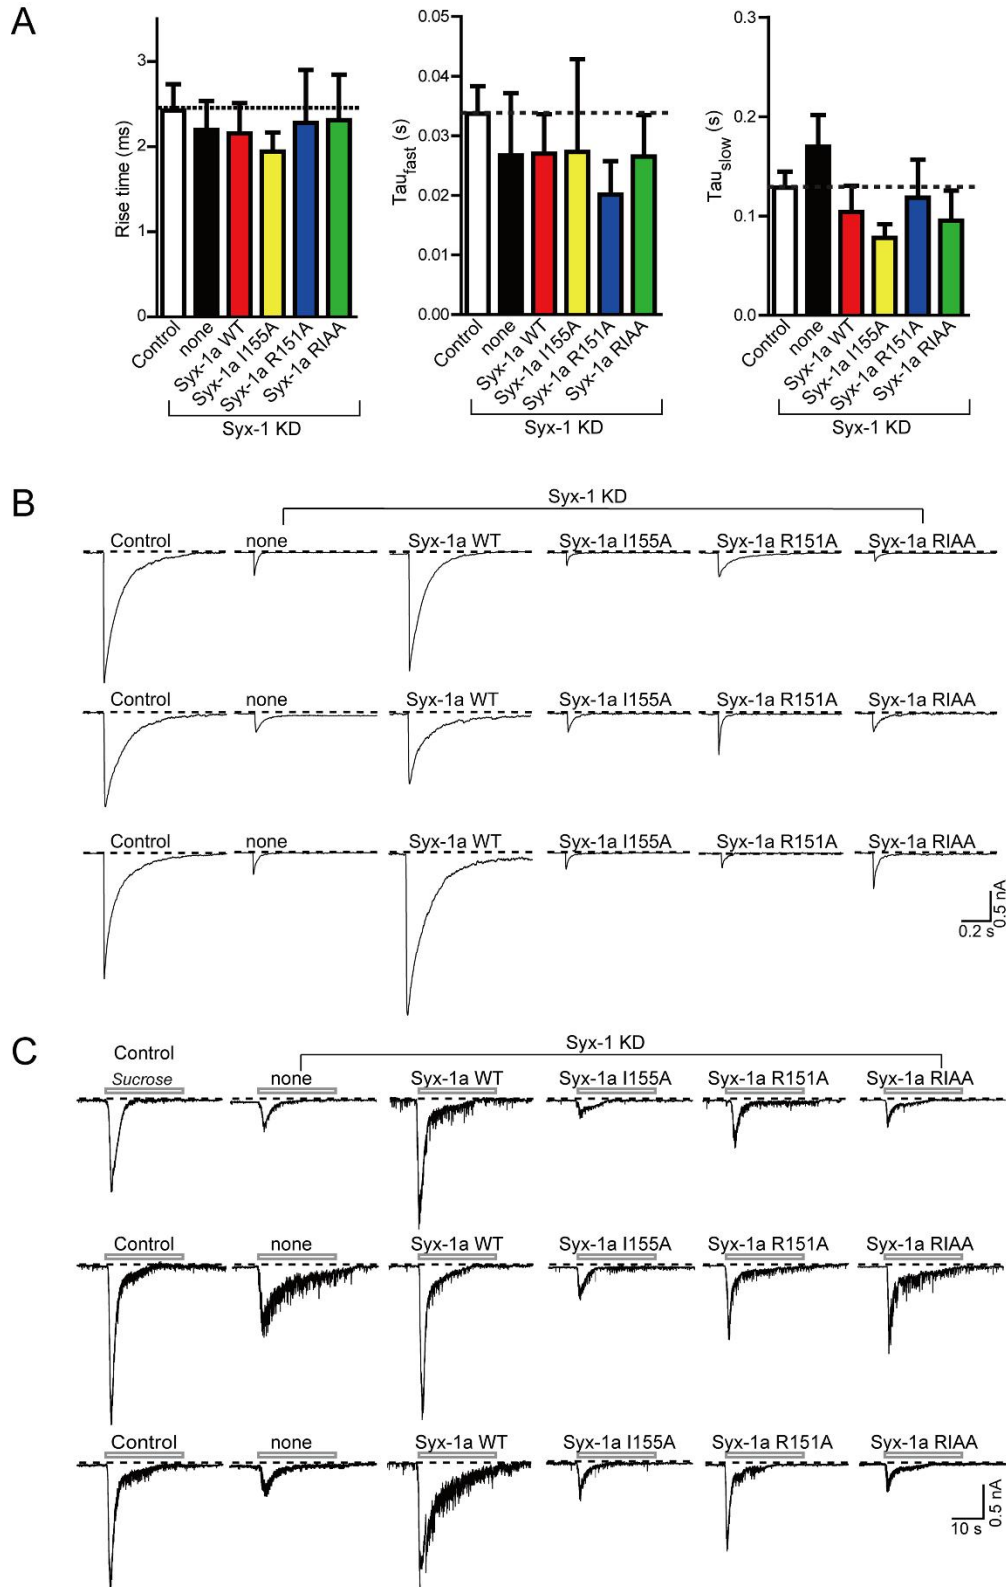

## Appendix Figure S1

**The syntaxin-1 R151A, I155A mutations do not influence the release kinetics.**

A. Summary graphs of rise times (left), decay times  $\tau_{\text{fast}}$  (center), and decay times  $\tau_{\text{slow}}$  (right) of the evoked-IPSC experiments shown in Fig 2B.

B. Three additional example recordings illustrate the variability of the evoked-IPSC experiments shown in Fig 2B.

C. Three additional example recordings illustrate the variability of RRP experiments shown in Fig 2C. Data are presented as means  $\pm$  SEM.

Appendix Figure S2

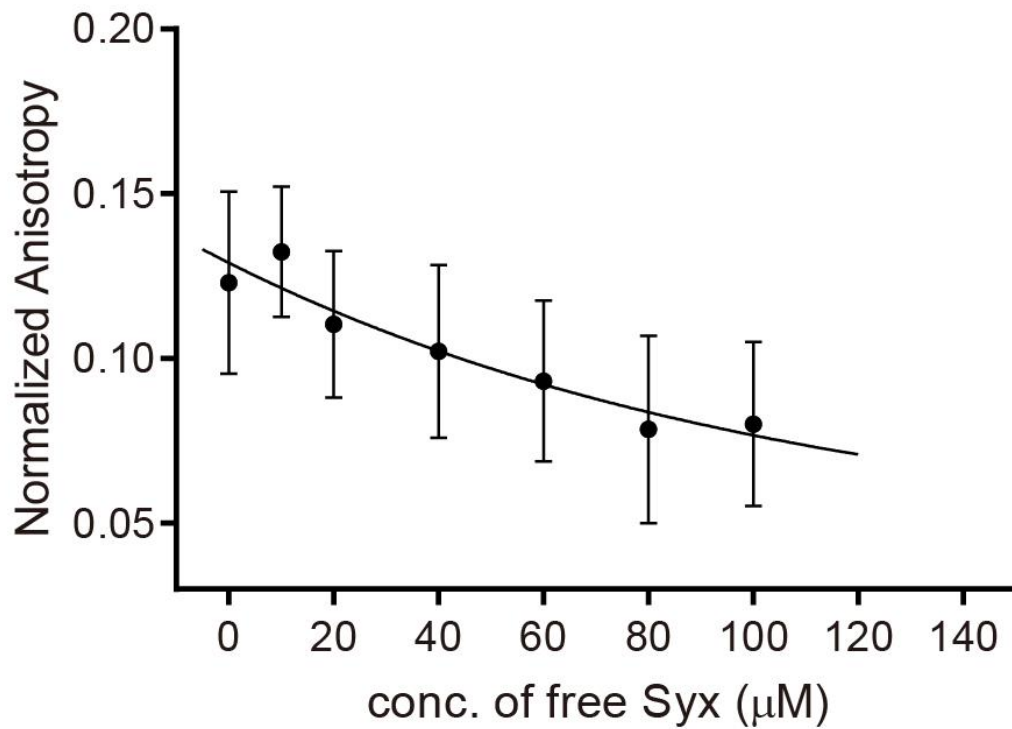

Appendix Figure S2

**Competitive effect of the cytoplasmic domain of syntaxin-1 (residues 2–253) in the binding between the fluorescent dye-labeled syntaxin-1 linker peptide (residues 148–162) and the MUN-BC fragment.** The concentrations of the MUN-BC fragment and the rhodamine B-labeled syntaxin peptide are 60 μM and 50 nM, respectively. Measurements are shown as means ± SEM (n = 10). A single exponential decay curve was fit to the data (solid line).

### Appendix Figure S3

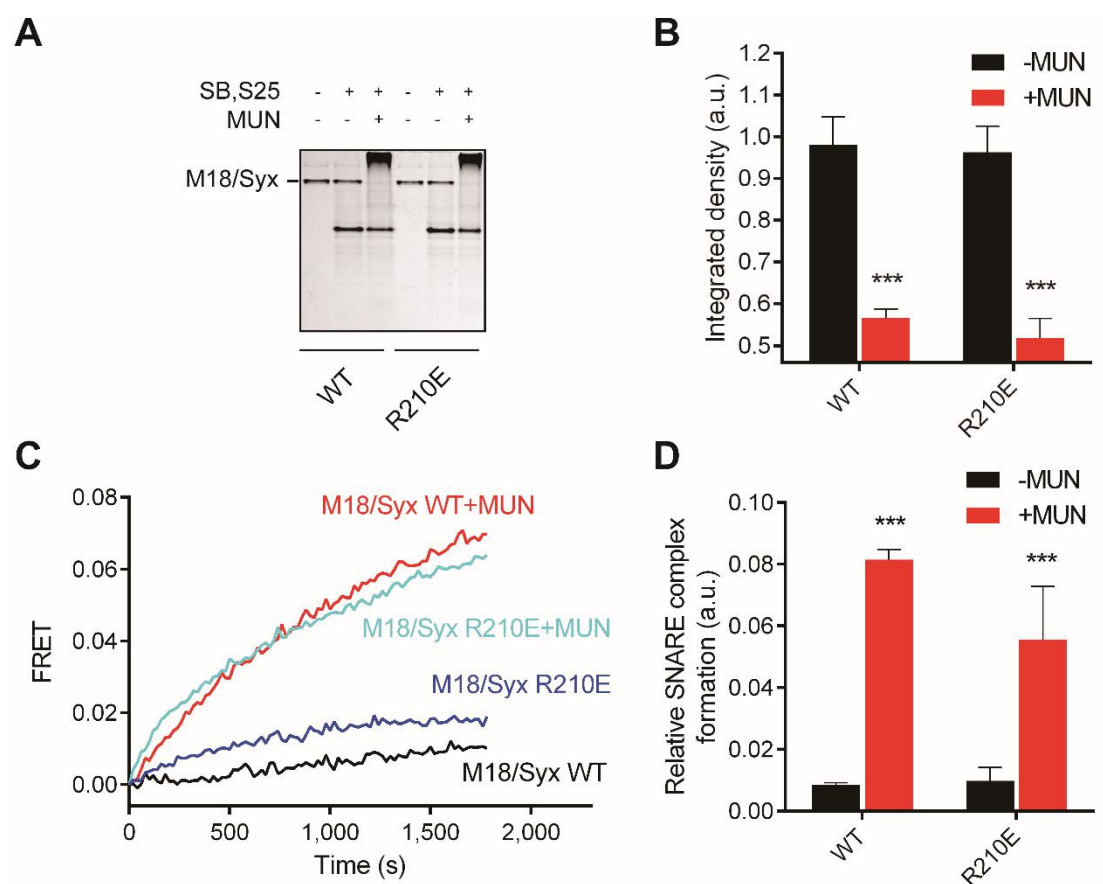

### Appendix Figure S3

**The syntaxin-1 R210E mutant does not influence the transit of syntaxin-1 from the Munc18-1/syntaxin-1 complex to the ternary SNARE complex mediated by the MUN domain.**

A, B. Measurements of the transition from the Munc18-1/syntaxin-1 complex to the SNARE complex by native gel experiments. Representative Coomassie brilliant blue-stained native electrophoresis gels from one of three independent experiments are shown. The data were processed by Image J (NIH).

C, D. Measurements of the transit of syntaxin-1 from the Munc18-1/syntaxin-1

complex to the ternary SNARE complex using an ensemble FRET assay.

Measurements are shown as means  $\pm$  SD and the significance was assessed by the

Student's t-test using  $n = 3$  technical replicates.

## Appendix Tables

### Appendix Table S1

Data summary table for the results shown in Figure 4 for the specified mutants of uncomplexed syntaxin-1-CC and syntaxin-1-CC (RIAA: R151A/I155A, LEAA: L165A/E166A, LEAA+RIAA: R151A/I155A/L165A/E166A)\*

|                  | FRET efficiency<br>(state 1) | FRET efficiency<br>(state 2) | % population of<br>state 1 |
|------------------|------------------------------|------------------------------|----------------------------|
| <b>WT</b>        | 0.311 ± 0.025                | 0.584 ± 0.006                | 33.07 ± 6.83               |
| <b>RIAA</b>      | 0.278 ± 0.003                | 0.592 ± 0.015                | 29.11 ± 13.5               |
| <b>LEAA</b>      | 0.347 ± 0.002                | 0.646 ± 0.013                | 90.15 ± 0.49               |
| <b>LEAA+RIAA</b> | 0.338 ± 0.027                | 0.649 ± 0.013                | 87.60 ± 4.38               |

\* Shown are means ± SD.

Appendix Table S2

Data summary table for results shown in Figure 4 for syntaxin-1-CC\*

|           | Conditions                 | FRET efficiency | Number of analyzed traces | Student's t-test (p value) |
|-----------|----------------------------|-----------------|---------------------------|----------------------------|
| WT        | <b>uncomplexed</b>         | 0.584 ± 0.006   | 90                        | 0.007                      |
|           | <b>M18</b>                 | 0.747 ± 0.018   | 66                        |                            |
|           | <b>S25+SB</b>              | 0.156 ± 0.027   | 77                        | 0.002                      |
|           | <b>M18+S25+SB</b>          | 0.742 ± 0.028   | 70                        | 0.706                      |
|           | <b>M18+MUN</b>             | 0.714 ± 0.008   | 57                        | 0.131                      |
|           | <b>M18+S25+SB+MUN</b>      | 0.217 ± 0.005   | 105                       | 0.001                      |
|           | <b>M18+MUN NFAA</b>        | 0.728 ± 0.011   | 65                        | 0.319                      |
|           | <b>M18+S25+SB+MUN NFAA</b> | 0.729 ± 0.002   | 80                        | 0.270                      |
| RIAA      | <b>uncomplexed</b>         | 0.592 ± 0.015   | 99                        | 0.015                      |
|           | <b>M18</b>                 | 0.764 ± 0.026   | 105                       |                            |
|           | <b>S25+SB</b>              | 0.135 ± 0.029   | 93                        | 0.002                      |
|           | <b>M18+S25+SB</b>          | 0.729 ± 0.015   | 97                        | 0.243                      |
|           | <b>M18+MUN</b>             | 0.713 ± 0.024   | 136                       | 0.179                      |
|           | <b>M18+S25+SB+MUN</b>      | 0.718 ± 0.016   | 129                       | 0.172                      |
| LEAA      | <b>uncomplexed</b>         | 0.347 ± 0.002   | 104                       | 0.002                      |
|           | <b>M18</b>                 | 0.701 ± 0.007   | 131                       |                            |
|           | <b>M18+MUN</b>             | 0.693 ± 0.004   | 133                       | 0.304                      |
|           | <b>M18+S25+SB</b>          | 0.205 ± 0.007   | 90                        | 0.0002                     |
|           | <b>M18+S25+SB+MUN</b>      | 0.196 ± 0.012   | 102                       | 0.0004                     |
| LEAA+RIAA | <b>uncomplexed</b>         | 0.338 ± 0.027   | 99                        | 0.004                      |
|           | <b>M18</b>                 | 0.716 ± 0.023   | 116                       |                            |
|           | <b>M18+MUN</b>             | 0.713 ± 0.010   | 98                        | 0.879                      |
|           | <b>M18+S25+SB</b>          | 0.203 ± 0.003   | 107                       | 0.001                      |
|           | <b>M18+S25+SB+MUN</b>      | 0.199 ± 0.017   | 104                       | 0.002                      |

\* Shown are means ± SD.



Appendix Table S3

Data summary table for results shown in Figure 4 for syntaxin-1-MN\*

|           | Conditions                 | FRET efficiency | Number of analyzed traces | Student's t-test (p value) |
|-----------|----------------------------|-----------------|---------------------------|----------------------------|
| WT        | <b>uncomplexed</b>         | 0.521 ± 0.001   | 79                        | 0.003                      |
|           | <b>M18</b>                 | 0.603 ± 0.006   | 94                        |                            |
|           | <b>S25+SB</b>              | 0.403 ± 0.010   | 92                        | 0.002                      |
|           | <b>M18+S25+SB</b>          | 0.617 ± 0.010   | 46                        | 0.264                      |
|           | <b>M18+MUN</b>             | 0.513 ± 0.010   | 80                        | 0.008                      |
|           | <b>M18+S25+SB+MUN</b>      | 0.412 ± 0.003   | 90                        | 0.001                      |
|           | <b>M18+MUN NFAA</b>        | 0.594 ± 0.004   | 82                        | 0.221                      |
|           | <b>M18+S25+SB+MUN NFAA</b> | 0.596 ± 0.005   | 58                        | 0.344                      |
| RIAA      | <b>uncomplexed</b>         | 0.518 ± 0.009   | 93                        | 0.007                      |
|           | <b>M18</b>                 | 0.599 ± 0.003   | 128                       |                            |
|           | <b>S25+SB</b>              | 0.406 ± 0.001   | 153                       | 0.0001                     |
|           | <b>M18+S25+SB</b>          | 0.610 ± 0.004   | 70                        | 0.078                      |
|           | <b>M18+MUN</b>             | 0.613 ± 0.018   | 112                       | 0.399                      |
|           | <b>M18+S25+SB+MUN</b>      | 0.611 ± 0.016   | 105                       | 0.396                      |
| LEAA      | <b>uncomplexed</b>         | 0.441 ± 0.015   | 141                       | 0.402                      |
|           | <b>M18</b>                 | 0.456 ± 0.013   | 58                        |                            |
|           | <b>M18+MUN</b>             | 0.450 ± 0.020   | 91                        | 0.746                      |
|           | <b>M18+S25+SB</b>          | 0.437 ± 0.019   | 114                       | 0.366                      |
|           | <b>M18+S25+SB+MUN</b>      | 0.425 ± 0.016   | 103                       | 0.161                      |
| LEAA+RIAA | <b>uncomplexed</b>         | 0.435 ± 0.013   | 76                        | 0.670                      |
|           | <b>M18</b>                 | 0.444 ± 0.022   | 90                        |                            |
|           | <b>M18+MUN</b>             | 0.450 ± 0.028   | 51                        | 0.857                      |
|           | <b>M18+S25+SB</b>          | 0.425 ± 0.014   | 117                       | 0.400                      |
|           | <b>M18+S25+SB+MUN</b>      | 0.435 ± 0.008   | 113                       | 0.625                      |

\* Shown are means ± SD.
